# Supplementary material
Source: PubMed Central journal article supplement (PMC5824207)
Supplement: jamaoncol-3-610-s001.pdf [file jamaoncol-3-610-s001.pdf]

## Supplementary Online Content

Salazar MC, Rosen JE, Wang Z, et al. Association of delayed adjuvant chemotherapy with survival after lung cancer surgery. *JAMA Oncol*. Published online January 5, 2016. doi:10.1001/jamaoncol.2016.5829.

**eTable 1.** Patient Characteristics of the Propensity-Matched Pairs of Surgery Only and “Earlier” Adjuvant Chemotherapy Group.

**eTable 2.** Patient Characteristics of the Propensity-Matched Pairs of Surgery Only and “Reference Interval” Adjuvant Chemotherapy Group.

**eTable 3.** Patient Characteristics of the Propensity-Matched Pairs of Surgery Only and “Later” Adjuvant Chemotherapy Group.

**eTable 4.** Cox Proportional Hazards Model of Adjuvant Chemotherapy Patients “Landmarked” at 120 Days After Surgery.

**eTable 5.** Multivariate Logistic Regression Modeling of Predictors of “Later” (>56 Days) Initiation of Adjuvant Chemotherapy.

This supplementary material has been provided by the authors to give readers additional information about their work.

## Supplement

### Elements Included

1. eTable 1. Patient Characteristics of the Propensity-Matched Pairs of Surgery Only and “Earlier” Adjuvant Chemotherapy Group.
2. eTable 2. Patient Characteristics of the Propensity-Matched Pairs of Surgery Only and “Reference Interval” Adjuvant Chemotherapy Group.
3. eTable 3. Patient Characteristics of the Propensity-Matched Pairs of Surgery Only and “Later” Adjuvant Chemotherapy Group.
4. eTable 4. Cox Proportional Hazards Model of Adjuvant Chemotherapy Patients “Landmarked” at 120 Days After Surgery.
5. eTable 5. Multivariate Logistic Regression Modeling of Predictors of “Later” (>56 Days) Initiation of Adjuvant Chemotherapy.

**eTable 1. Patient Characteristics of the Propensity-Matched Pairs of Surgery Only and “Earlier” Adjuvant Chemotherapy Group.**

| Characteristic                    | Surgery Only<br>(N = 3,277)   | “Earlier”<br>(N = 3,277)   | <i>p</i><br>Value         |
|-----------------------------------|-------------------------------|----------------------------|---------------------------|
|                                   | n (%)                         | n (%)                      |                           |
| <b>Facility Type</b>              |                               |                            |                           |
| Academic/Research Program         | 904 (28)                      | 921 (28)                   | 0.64                      |
| Non-Academic Program <sup>a</sup> | 2,373 (72)                    | 2,356 (72)                 |                           |
| <b>Facility Location</b>          |                               |                            |                           |
| New England                       | 173 (5)                       | 163 (5)                    | 0.98                      |
| Middle Atlantic                   | 356 (11)                      | 378 (12)                   |                           |
| South Atlantic                    | 799 (24)                      | 808 (25)                   |                           |
| East North Central                | 774 (24)                      | 759 (23)                   |                           |
| East South Central                | 277 (8)                       | 287 (9)                    |                           |
| West North Central                | 340 (10)                      | 343 (10)                   |                           |
| West South Central                | 202 (6)                       | 193 (6)                    |                           |
| Mountain                          | 121 (4)                       | 124 (4)                    |                           |
| Pacific                           | 235 (7)                       | 222 (7)                    |                           |
| <b>Age, mean (SD), years</b>      | 63 (11)                       | 63 (9)                     | 0.57                      |
| <b>Sex</b>                        |                               |                            |                           |
| Male                              | 1,811 (55)                    | 1,821 (56)                 | 0.80                      |
| Female                            | 1,466 (45)                    | 1,456 (44)                 |                           |
| <b>Race</b>                       |                               |                            |                           |
| White                             | 2,932 (89)                    | 2,953 (90)                 | 0.39                      |
| Non-White                         | 345 (11)                      | 324 (10)                   |                           |
| <b>Hispanic Origin</b>            |                               |                            |                           |
| Non-Hispanic                      | 2,943 (90)                    | 2,947 (90)                 | 0.82                      |
| Hispanic Origin                   | 67 (2)                        | 60 (2)                     |                           |
| Unknown                           | 267 (8)                       | 270 (8)                    |                           |
| <b>Insurance Status</b>           |                               |                            |                           |
| Not Insured                       | 87 (3)                        | 79 (2)                     | 0.99                      |
| Private Insurance                 | 1,470 (45)                    | 1,492 (46)                 |                           |
| <b>Characteristic</b>             | <b>Surgery Only<br/>n (%)</b> | <b>“Earlier”<br/>n (%)</b> | <b><i>p</i><br/>Value</b> |
| Medicaid                          | 171 (5)                       | 169 (5)                    |                           |
| Medicare                          | 1,469 (45)                    | 1,457 (44)                 |                           |
| Other Government                  | 40 (1)                        | 40 (1)                     |                           |
| Status Unknown                    | 40 (1)                        | 40 (1)                     |                           |
| <b>Income<sup>b</sup></b>         |                               |                            |                           |

|                                      |                     |                  |              |
|--------------------------------------|---------------------|------------------|--------------|
| < \$38,000                           | 578 (18)            | 610 (19)         | 0.62         |
| \$38,000-\$47,999                    | 856 (26)            | 826 (25)         |              |
| \$48,000-\$62,999                    | 947 (29)            | 915 (28)         |              |
| 63,000 +                             | 839 (26)            | 872 (27)         |              |
| Unknown                              | 57 (2)              | 54 (2)           |              |
| <b>Education<sup>c</sup></b>         |                     |                  |              |
| ≥ 21%                                | 500 (15)            | 507 (15)         | 0.88         |
| 13%-20.9%                            | 868 (26)            | 891 (27)         |              |
| 7%-12.9%                             | 1,168 (36)          | 1,129 (34)       |              |
| < 7%                                 | 685 (21)            | 697 (21)         |              |
| Unknown                              | 56 (2)              | 53 (2)           |              |
| <b>Area of Residence<sup>b</sup></b> |                     |                  |              |
| Metropolitan                         | 2,509 (77)          | 2,526 (77)       | 0.78         |
| Urban                                | 555 (17)            | 551 (17)         |              |
| Rural                                | 102 (3)             | 88 (3)           |              |
| Unknown                              | 111 (3)             | 112 (3)          |              |
| <b>Charlson-Deyo Score</b>           |                     |                  |              |
| 0                                    | 1,765 (54)          | 1,771 (54)       | 0.82         |
| 1                                    | 1,132 (35)          | 1,142 (35)       |              |
| 2+                                   | 380 (12)            | 364 (11)         |              |
| <b>Year of Diagnosis</b>             |                     |                  |              |
| 2004                                 | 268 (8)             | 275 (8)          | 0.99         |
| 2005                                 | 408 (12)            | 392 (12)         |              |
| 2006                                 | 436 (13)            | 414 (13)         |              |
| <b>Characteristic</b>                | <b>Surgery Only</b> | <b>“Earlier”</b> | <b>P</b>     |
|                                      | <b>n (%)</b>        | <b>n (%)</b>     | <b>Value</b> |
| 2007                                 | 349 (11)            | 358 (11)         |              |
| 2008                                 | 336 (10)            | 347 (11)         |              |
| 2009                                 | 330 (10)            | 329 (10)         |              |
| 2010                                 | 333 (10)            | 327 (10)         |              |
| 2011                                 | 375 (11)            | 385 (12)         |              |
| 2012                                 | 442 (13)            | 450 (14)         |              |
| <b>Primary Site</b>                  |                     |                  |              |
| Upper Lobe                           | 1,893 (58)          | 1,905 (58)       | 0.99         |
| Middle Lobe                          | 121 (4)             | 124 (4)          |              |
| Lower Lobe                           | 1,134 (35)          | 1,121 (34)       |              |
| Overlapping Lesion                   | 68 (2)              | 70 (2)           |              |
| Lung, NOS                            | 61 (2)              | 57 (2)           |              |
| <b>Tumor Laterality</b>              |                     |                  |              |

|                                                |                               |                            |                    |
|------------------------------------------------|-------------------------------|----------------------------|--------------------|
| Right                                          | 1,806 (55)                    | 1,803 (55)                 | 0.95               |
| Left                                           | 1,468 (45)                    | 1,470 (45)                 |                    |
| Unknown                                        | ~                             | ~                          |                    |
| <b>Tumor Histological Type</b>                 |                               |                            |                    |
| Adenocarcinoma                                 | 1,890 (58)                    | 1,888 (58)                 | 0.98               |
| Squamous Cell Carcinoma                        | 1,052 (32)                    | 1,044 (32)                 |                    |
| Large Cell Carcinoma                           | 153 (5)                       | 156 (5)                    |                    |
| Other <sup>d</sup>                             | 182 (6)                       | 189 (6)                    |                    |
| <b>Tumor Grade</b>                             |                               |                            |                    |
| 1                                              | 187 (6)                       | 171 (5)                    | 0.92               |
| 2                                              | 1,303 (40)                    | 1,307 (40)                 |                    |
| 3                                              | 1,578 (48)                    | 1,596 (49)                 |                    |
| 4                                              | 108 (3)                       | 106 (3)                    |                    |
| Undetermined                                   | 101 (3)                       | 97 (3)                     |                    |
| <b>Tumor Pathologic Stage</b>                  |                               |                            |                    |
| I                                              | 766 (23)                      | 765 (23)                   | 0.8                |
| <b>Characteristic</b>                          | <b>Surgery Only<br/>n (%)</b> | <b>“Earlier”<br/>n (%)</b> | <b>p<br/>Value</b> |
| II                                             | 1,616 (49)                    | 1,594 (49)                 |                    |
| III                                            | 895 (27)                      | 918 (28)                   |                    |
| <b>Tumor Size, mean (SD), cm</b>               | 4.5 (3.5)                     | 4.5 (3.4)                  | 0.67               |
| <b>Type of Resection</b>                       |                               |                            |                    |
| Lobectomy                                      | 2,865 (87)                    | 2,892 (88)                 | 0.31               |
| Pneumonectomy                                  | 412 (13)                      | 385 (12)                   |                    |
| <b>Length of Inpatient Stay</b>                |                               |                            |                    |
| ≤ 14 Days                                      | 2,917 (89)                    | 3,213 (98)                 | <0.001             |
| > 14 Days                                      | 360 (11)                      | 64 (2)                     |                    |
| <b>Readmission Within 30 Days of Discharge</b> |                               |                            |                    |
| No                                             | 2,918 (89)                    | 2,955 (90)                 | <0.001             |
| Unplanned                                      | 200 (6)                       | 102 (3)                    |                    |
| Planned                                        | 95 (3)                        | 136 (4)                    |                    |
| Planned and Unplanned                          | ~                             | ~                          |                    |
| Unknown                                        | 60 (2)                        | 80 (2)                     |                    |
| <b>Ninety Day Mortality</b>                    |                               |                            |                    |
| Alive > 90 days                                | 3,078 (94)                    | 3,226 (98)                 | <0.001             |
| Died ≤ 90 days                                 | 172 (5)                       | 41 (1)                     |                    |

|         |        |        |  |
|---------|--------|--------|--|
| Unknown | 27 (1) | 10 (0) |  |
|---------|--------|--------|--|

SD = Standard deviation

NOS = Not otherwise specified

a = Includes Community Cancer Program, Comprehensive Community Cancer Program, Integrated Network Cancer Program and other specified types of cancer programs.

b = Based on patient's zip code area.

c = Percent of people in the patient's zip code area with no high-school diploma.

d = Non-small cell not further defined.

~ = Frequencies < 10 not reported per National Cancer Database guidelines.

All percentages might not add up to 100% due to approximation.

**eTable 2. Patient Characteristics of the Propensity-Matched Pairs of Surgery Only and “Reference Interval” Adjuvant Chemotherapy Group.**

| Characteristic                    | Surgery Only<br>(N = 4,967)   | “Reference Interval”<br>(N = 4,967)   | <i>p</i><br>Value         |
|-----------------------------------|-------------------------------|---------------------------------------|---------------------------|
|                                   | n (%)                         | n (%)                                 |                           |
| <b>Facility Type</b>              |                               |                                       |                           |
| Academic/Research Program         | 1,679 (34)                    | 1,694 (34)                            | 0.75                      |
| Non-Academic Program <sup>a</sup> | 3,288 (66)                    | 3,273 (66)                            |                           |
| <b>Facility Location</b>          |                               |                                       |                           |
| New England                       | 278 (6)                       | 292 (6)                               | 0.98                      |
| Middle Atlantic                   | 661 (13)                      | 660 (13)                              |                           |
| South Atlantic                    | 1,164 (23)                    | 1,172 (24)                            |                           |
| East North Central                | 1,074 (22)                    | 1,066 (21)                            |                           |
| East South Central                | 532 (11)                      | 505 (10)                              |                           |
| West North Central                | 482 (10)                      | 490 (10)                              |                           |
| West South Central                | 286 (6)                       | 274 (6)                               |                           |
| Mountain                          | 147 (3)                       | 144 (3)                               |                           |
| Pacific                           | 343 (7)                       | 364 (7)                               |                           |
| <b>Age, mean (SD), years</b>      | 63 (11)                       | 64 (9)                                | 0.41                      |
| <b>Sex</b>                        |                               |                                       |                           |
| Male                              | 2,647 (53)                    | 2,666 (54)                            | 0.70                      |
| Female                            | 2,320 (47)                    | 2,301 (46)                            |                           |
| <b>Race</b>                       |                               |                                       |                           |
| White                             | 4,318 (87)                    | 4,330 (87)                            | 0.72                      |
| Non-White                         | 649 (13)                      | 637 (13)                              |                           |
| <b>Hispanic Origin</b>            |                               |                                       |                           |
| Non-Hispanic                      | 4,496 (91)                    | 4,496 (91)                            | 0.62                      |
| Hispanic Origin                   | 101 (2)                       | 89 (2)                                |                           |
| Unknown                           | 370 (7)                       | 382 (8)                               |                           |
| <b>Insurance Status</b>           |                               |                                       |                           |
| Not Insured                       | 143 (3)                       | 130 (3)                               | 0.80                      |
| <b>Characteristic</b>             | <b>Surgery Only<br/>n (%)</b> | <b>“Reference Interval”<br/>n (%)</b> | <b><i>p</i><br/>Value</b> |
| Private Insurance                 | 2,044 (41)                    | 2,085 (42)                            |                           |
| Medicaid                          | 295 (6)                       | 273 (5)                               |                           |
| Medicare                          | 2,363 (48)                    | 2,367 (48)                            |                           |

|                                      |                               |                                       |                    |
|--------------------------------------|-------------------------------|---------------------------------------|--------------------|
| Other Government                     | 51 (1)                        | 46 (1)                                |                    |
| Status Unknown                       | 71 (1)                        | 66 (1)                                |                    |
| <b>Income<sup>b</sup></b>            |                               |                                       |                    |
| < \$38,000                           | 980 (20)                      | 964 (19)                              | 0.98               |
| \$38,000-\$47,999                    | 1,244 (25)                    | 1,243 (25)                            |                    |
| \$48,000-\$62,999                    | 1,368 (28)                    | 1,366 (28)                            |                    |
| 63,000 +                             | 1,281 (26)                    | 1,303 (26)                            |                    |
| Unknown                              | 94 (2)                        | 91 (2)                                |                    |
| <b>Education<sup>c</sup></b>         |                               |                                       |                    |
| ≥ 21%                                | 755 (15)                      | 732 (15)                              | 0.89               |
| 13%-20.9%                            | 1,456 (29)                    | 1,430 (29)                            |                    |
| 7%-12.9%                             | 1,663 (33)                    | 1,693 (34)                            |                    |
| < 7%                                 | 1,003 (20)                    | 1,024 (21)                            |                    |
| Unknown                              | 90 (2)                        | 88 (2)                                |                    |
| <b>Area of Residence<sup>b</sup></b> |                               |                                       |                    |
| Metropolitan                         | 3,789 (76)                    | 3,788 (76)                            | 0.96               |
| Urban                                | 851 (17)                      | 856 (17)                              |                    |
| Rural                                | 132 (3)                       | 137 (3)                               |                    |
| Unknown                              | 195 (4)                       | 186 (4)                               |                    |
| <b>Charlson-Deyo Score</b>           |                               |                                       |                    |
| 0                                    | 2,653 (53)                    | 2,649 (53)                            | 0.38               |
| 1                                    | 1,702 (34)                    | 1,746 (35)                            |                    |
| 2+                                   | 612 (12)                      | 572 (12)                              |                    |
| <b>Year of Diagnosis</b>             |                               |                                       |                    |
| 2004                                 | 343 (7)                       | 344 (7)                               | 0.97               |
| 2005                                 | 512 (10)                      | 478 (10)                              |                    |
| <b>Characteristic</b>                | <b>Surgery Only<br/>n (%)</b> | <b>“Reference Interval”<br/>n (%)</b> | <b>p<br/>Value</b> |
| 2006                                 | 522 (11)                      | 545 (11)                              |                    |
| 2007                                 | 536 (11)                      | 530 (11)                              |                    |
| 2008                                 | 556 (11)                      | 565 (11)                              |                    |
| 2009                                 | 486 (10)                      | 503 (10)                              |                    |
| 2010                                 | 648 (13)                      | 634 (13)                              |                    |
| 2011                                 | 661 (13)                      | 653 (13)                              |                    |
| 2012                                 | 703 (14)                      | 715 (14)                              |                    |
| <b>Primary Site</b>                  |                               |                                       |                    |
| Upper Lobe                           | 2,880 (58)                    | 2,845 (57)                            | 0.97               |
| Middle Lobe                          | 217 (4)                       | 220 (4)                               |                    |



|                                                |                               |                                       |                    |
|------------------------------------------------|-------------------------------|---------------------------------------|--------------------|
| Lower Lobe                                     | 1,639 (33)                    | 1,669 (34)                            |                    |
| Overlapping Lesion                             | 145 (3)                       | 147 (3)                               |                    |
| Lung, NOS                                      | 86 (2)                        | 86 (2)                                |                    |
| <b>Tumor Laterality</b>                        |                               |                                       |                    |
| Right                                          | 2,772 (56)                    | 2,747 (55)                            | 0.66               |
| Left                                           | 2192 (44)                     | 2,216 (45)                            |                    |
| Unknown                                        | ~                             | ~                                     |                    |
| <b>Tumor Histological Type</b>                 |                               |                                       |                    |
| Adenocarcinoma                                 | 2,707 (54)                    | 2,740 (55)                            | 0.83               |
| Squamous Cell Carcinoma                        | 1,784 (36)                    | 1,744 (35)                            |                    |
| Large Cell Carcinoma                           | 219 (4)                       | 216 (4)                               |                    |
| Other <sup>d</sup>                             | 257 (5)                       | 267 (5)                               |                    |
| <b>Tumor Grade</b>                             |                               |                                       |                    |
| 1                                              | 275 (6)                       | 258 (5)                               | 0.85               |
| 2                                              | 2,022 (41)                    | 2,041 (41)                            |                    |
| 3                                              | 2,375 (48)                    | 2,362 (48)                            |                    |
| 4                                              | 116 (2)                       | 129 (3)                               |                    |
| Undetermined                                   | 179 (4)                       | 177 (4)                               |                    |
|                                                |                               |                                       |                    |
| <b>Characteristic</b>                          | <b>Surgery Only<br/>n (%)</b> | <b>“Reference Interval”<br/>n (%)</b> | <b>p<br/>Value</b> |
| <b>Tumor Pathologic State</b>                  |                               |                                       |                    |
| I                                              | 1,240 (25)                    | 1,253 (25)                            | 0.94               |
| II                                             | 2,428 (49)                    | 2,428 (49)                            |                    |
| III                                            | 1,299 (26)                    | 1,286 (26)                            |                    |
| <b>Tumor Size, mean (SD), cm</b>               | 4.6 (4.0)                     | 4.6 (2.9)                             | 0.49               |
| <b>Type of Resection</b>                       |                               |                                       |                    |
| Lobectomy                                      | 4,254 (86)                    | 4,327 (87)                            | 0.03               |
| Pneumonectomy                                  | 713 (14)                      | 640 (13)                              |                    |
| <b>Length of Inpatient Stay</b>                |                               |                                       |                    |
| ≤ 14 Days                                      | 4,408 (89)                    | 4,814 (97)                            | <0.001             |
| > 14 Days                                      | 559 (11)                      | 153 (3)                               |                    |
| <b>Readmission Within 30 Days of Discharge</b> |                               |                                       |                    |

|                             |            |            |        |
|-----------------------------|------------|------------|--------|
| No                          | 4,450 (90) | 4,519 (91) | <0.001 |
| Unplanned                   | 303 (6)    | 133 (3)    |        |
| Planned                     | 110 (2)    | 161 (3)    |        |
| Planned and Unplanned       | ~          | ~          |        |
| Unknown                     | 97 (2)     | 148 (3)    |        |
| <b>Ninety Day Mortality</b> |            |            |        |
| Alive > 90 days             | 4,654 (94) | 4,907 (99) | <0.001 |
| Died ≤ 90 days              | 275 (6)    | 44 (1)     |        |
| Unknown                     | 38 (1)     | 16 (0)     |        |

SD = Standard deviation

NOS = Not otherwise specified

a = Includes Community Cancer Program, Comprehensive Community Cancer Program, Integrated Network Cancer Program and other specified types of cancer programs.

b = Based on patient's zip code area.

c = Percent of people in the patient's zip code area with no high-school diploma.

d = Non-small cell not further defined.

~ = Frequencies < 10 not reported per National Cancer Database guidelines.

All percentages might not add up to 100% due to approximation.

**eTable 3. Patient Characteristics of the Propensity-Matched Pairs of Surgery Only and “Later” Adjuvant Chemotherapy Group.**

| Characteristic                    | Surgery Only (N = 3,976)  | "Later" (N = 3,976)  | <i>p</i> Value        |
|-----------------------------------|---------------------------|----------------------|-----------------------|
|                                   | n (%)                     | n (%)                |                       |
| <b>Facility Type</b>              |                           |                      |                       |
| Academic/Research Program         | 1,605 (40)                | 1,643 (41)           | 0.39                  |
| Non-Academic Program <sup>a</sup> | 2,371 (60)                | 2,333 (59)           |                       |
| <b>Facility Location</b>          |                           |                      |                       |
| New England                       | 241 (6)                   | 245 (6)              | 0.99                  |
| Middle Atlantic                   | 542 (14)                  | 548 (14)             |                       |
| South Atlantic                    | 997 (25)                  | 996 (25)             |                       |
| East North Central                | 855 (22)                  | 855 (22)             |                       |
| East South Central                | 307 (8)                   | 312 (8)              |                       |
| West North Central                | 399 (10)                  | 387 (10)             |                       |
| West South Central                | 205 (5)                   | 213 (5)              |                       |
| Mountain                          | 119 (3)                   | 116 (3)              |                       |
| Pacific                           | 311 (8)                   | 304 (8)              |                       |
| <b>Age, mean (SD), years</b>      | 64 (11)                   | 64 (9)               | 0.84                  |
| <b>Sex</b>                        |                           |                      |                       |
| Male                              | 2,123 (53)                | 2,058 (52)           | 0.14                  |
| Female                            | 1,853 (47)                | 1,918 (48)           |                       |
| <b>Race</b>                       |                           |                      |                       |
| White                             | 3,399 (85)                | 3,411 (86)           | 0.70                  |
| Non-White                         | 577 (15)                  | 565 (14)             |                       |
| <b>Hispanic Origin</b>            |                           |                      |                       |
| Non-Hispanic                      | 3,544 (89)                | 3,550 (89)           | 0.96                  |
| Hispanic Origin                   | 90 (2)                    | 91 (2)               |                       |
| Unknown                           | 342 (9)                   | 335 (8)              |                       |
| <b>Insurance Status</b>           |                           |                      |                       |
| Not Insured                       | 142 (4)                   | 142 (4)              | 0.96                  |
| Private Insurance                 | 1,520 (38)                | 1,525 (38)           |                       |
| <b>Characteristic</b>             | <b>Surgery Only n (%)</b> | <b>“Later” n (%)</b> | <b><i>p</i> Value</b> |
| Medicaid                          | 272 (7)                   | 257 (6)              |                       |
| Medicare                          | 1,958 (49)                | 1,976 (50)           |                       |
| Other Government                  | 45 (1)                    | 39 (1)               |                       |
| Status Unknown                    | 39 (1)                    | 37 (1)               |                       |

|                                      |                     |                |              |
|--------------------------------------|---------------------|----------------|--------------|
| <b>Income<sup>b</sup></b>            |                     |                |              |
| < \$38,000                           | 761 (19)            | 765 (19)       | 0.88         |
| \$38,000-\$47,999                    | 1,042 (26)          | 1,016 (26)     |              |
| \$48,000-\$62,999                    | 1,123 (28)          | 1,109 (28)     |              |
| 63,000 +                             | 977 (25)            | 1,015 (26)     |              |
| Unknown                              | 73 (2)              | 71 (2)         |              |
| <b>Education<sup>c</sup></b>         |                     |                |              |
| ≥ 21%                                | 685 (17)            | 679 (17)       | 0.62         |
| 13%-20.9%                            | 1,141 (29)          | 1,096 (28)     |              |
| 7%-12.9%                             | 1,323 (33)          | 1,326 (33)     |              |
| < 7%                                 | 754 (19)            | 805 (20)       |              |
| Unknown                              | 73 (2)              | 70 (2)         |              |
| <b>Area of Residence<sup>b</sup></b> |                     |                |              |
| Metropolitan                         | 3,071 (77)          | 3,115 (78)     | 0.51         |
| Urban                                | 703 (18)            | 658 (17)       |              |
| Rural                                | 62 (2)              | 69 (2)         |              |
| Unknown                              | 140 (4)             | 134 (3)        |              |
| <b>Charlson-Deyo Score</b>           |                     |                |              |
| 0                                    | 2,038 (51)          | 2,084 (52)     | 0.11         |
| 1                                    | 1,399 (35)          | 1,415 (36)     |              |
| 2+                                   | 539 (14)            | 477 (12)       |              |
| <b>Year of Diagnosis</b>             |                     |                |              |
| 2004                                 | 306 (8)             | 308 (8)        | 0.94         |
| 2005                                 | 381 (10)            | 373 (9)        |              |
| 2006                                 | 350 (9)             | 381 (10)       |              |
| <b>Characteristic</b>                | <b>Surgery Only</b> | <b>“Later”</b> | <b>p</b>     |
|                                      | <b>(%)</b>          | <b>(%)</b>     | <b>Value</b> |
|                                      | <b>n</b>            | <b>n</b>       |              |
| 2007                                 | 441 (11)            | 443 (11)       |              |
| 2008                                 | 481 (12)            | 463 (12)       |              |
| 2009                                 | 473 (12)            | 458 (12)       |              |
| 2010                                 | 478 (12)            | 469 (12)       |              |
| 2011                                 | 535 (13)            | 523 (13)       |              |
| 2012                                 | 531 (13)            | 558 (14)       |              |
| <b>Primary Site</b>                  |                     |                |              |
| Upper Lobe                           | 2,269 (57)          | 2,267 (57)     | 0.78         |
| Middle Lobe                          | 183 (5)             | 174 (4)        |              |
| Lower Lobe                           | 1,299 (33)          | 1,312 (33)     |              |
| Overlapping Lesion                   | 138 (3)             | 149 (4)        |              |
| Lung, NOS                            | 87 (2)              | 74 (2)         |              |

|                                                |                     |                |              |
|------------------------------------------------|---------------------|----------------|--------------|
| <b>Tumor Laterality</b>                        |                     |                |              |
| Right                                          | 2,262 (57)          | 2,295 (58)     | 0.89         |
| Left                                           | 1,707 (43)          | 1,675 (42)     |              |
| Unknown                                        | ~                   | ~              |              |
| <b>Tumor Histological Type</b>                 |                     |                |              |
| Adenocarcinoma                                 | 2,067 (52)          | 2,057 (52)     | 0.95         |
| Squamous Cell Carcinoma                        | 1,480 (37)          | 1,496 (38)     |              |
| Large Cell Carcinoma                           | 177 (4)             | 184 (5)        |              |
| Other                                          | 243 (6)             | 239 (6)        |              |
| <b>Tumor Grade</b>                             |                     |                |              |
| 1                                              | 174 (4)             | 176 (4)        | 0.96         |
| 2                                              | 1,641 (41)          | 1,642 (41)     |              |
| 3                                              | 1,915 (48)          | 1,902 (48)     |              |
| 4                                              | 100 (3)             | 97 (2)         |              |
| Undetermined                                   | 146 (4)             | 159 (4)        |              |
| <b>Tumor Pathologic Stage</b>                  |                     |                |              |
| I                                              | 1,028 (26)          | 1,050 (26)     | 0.83         |
| <b>Characteristic</b>                          | <b>Surgery Only</b> | <b>“Later”</b> | <b>p</b>     |
|                                                | <b>(%)</b>          | <b>(%)</b>     | <b>Value</b> |
|                                                | <b>n</b>            | <b>n</b>       |              |
| II                                             | 1,804 (45)          | 1,800 (45)     |              |
| III                                            | 1,144 (29)          | 1,126 (28)     |              |
| <b>Tumor Size, mean (SD), cm</b>               | 4.6 (4.3)           | 4.7 (3.3)      | 0.71         |
| <b>Type of Resection</b>                       |                     |                |              |
| Lobectomy                                      | 3,400 (86)          | 3,401 (86)     | 0.97         |
| Pneumonectomy                                  | 576 (14)            | 575 (14)       |              |
| <b>Length of Inpatient Stay</b>                |                     |                |              |
| ≤ 14 Days                                      | 3,487 (88)          | 3,687 (93)     | <0.001       |
| > 14 Days                                      | 489 (12)            | 289 (7)        |              |
| <b>Readmission Within 30 Days of Discharge</b> |                     |                |              |
| No                                             | 3,582 (90)          | 3,581 (90)     | <0.001       |
| Unplanned                                      | 240 (6)             | 193 (5)        |              |
| Planned                                        | 81 (2)              | 71 (2)         |              |
| Planned and Unplanned                          | ~                   | ~              |              |
| Unknown                                        | 71 (2)              | 126 (3)        |              |

| <b>Ninety Day Mortality</b> |            |            |        |
|-----------------------------|------------|------------|--------|
| Alive > 90 days             | 3,715 (93) | 3,947 (99) | <0.001 |
| Died ≤ 90 days              | 226 (6)    | 21 (1)     |        |
| Unknown                     | 35 (1)     | ~          |        |

SD = Standard deviation

NOS = Not otherwise specified

a = Includes Community Cancer Program, Comprehensive Community Cancer Program, Integrated Network Cancer Program and other specified types of cancer programs.

b = Based on patient's zip code area.

c = Percent of people in the patient's zip code area with no high-school diploma.

d = Non-small cell not further defined.

~ = Frequencies < 10 not reported per National Cancer Database guidelines.

All percentages might not add up to 100% due to approximation.

**eTable 4. Cox Proportional Hazards Model of Adjuvant Chemotherapy Patients “Landmarked” at 120 Days After Surgery.**

| <b>Covariate</b>                    | <b>N</b> | <b>HR</b> | <b>LCL</b> | <b>UCL</b> | <b>p Value</b> |
|-------------------------------------|----------|-----------|------------|------------|----------------|
| <b>Adjuvant Chemotherapy Timing</b> |          |           |            |            |                |
| “Reference Interval”                | 5,033    | Ref       |            |            |                |
| “Earlier”                           | 3,278    | 1.003     | 0.937      | 1.074      | 0.93           |
| “Later”                             | 3,894    | 1.040     | 0.974      | 1.111      | 0.24           |
| <b>Facility Type</b>                |          |           |            |            |                |
| Academic/Research Program           | 4,155    | Ref       |            |            |                |
| Non-Academic Program <sup>a</sup>   | 8,050    | 1.072     | 1.009      | 1.138      | 0.02           |
| <b>Age</b>                          |          | 1.019     | 1.015      | 1.023      | <0.001         |
| <b>Sex</b>                          |          |           |            |            |                |
| Female                              | 5,716    | Ref       |            |            |                |
| Male                                | 6,489    | 1.254     | 1.185      | 1.328      | <0.001         |
| <b>Hispanic Origin</b>              |          |           |            |            |                |
| Non-Hispanic                        | 10,998   | Ref       |            |            |                |
| Hispanic Origin                     | 237      | 0.733     | 0.579      | 0.927      | 0.01           |
| Unknown                             | 970      | 0.958     | 0.868      | 1.056      | 0.39           |
| <b>Insurance Status</b>             |          |           |            |            |                |
| Medicare                            | 5,656    | Ref       |            |            |                |
| Medicaid                            | 698      | 1.187     | 1.039      | 1.356      | 0.01           |
| Not Insured                         | 346      | 1.020     | 0.845      | 1.232      | 0.83           |
| Other Government                    | 121      | 1.249     | 0.940      | 1.660      | 0.13           |
| Private Insurance                   | 5,241    | 0.900     | 0.837      | 0.968      | 0.005          |
| Status Unknown                      | 143      | 0.931     | 0.716      | 1.210      | 0.59           |
| <b>Income<sup>b</sup></b>           |          |           |            |            |                |
| \$63,000+                           | 3,222    | Ref       |            |            |                |
| \$48,000-\$62,999                   | 3,400    | 1.065     | 0.986      | 1.150      | 0.11           |
| \$38,000-47,999                     | 3,069    | 1.125     | 1.041      | 1.217      | 0.003          |
| < \$38,000                          | 2,313    | 1.174     | 1.079      | 1.277      | <0.001         |
| Unknown                             | 201      | 2.184     | 1.812      | 2.633      | <0.001         |
| <b>Charlson-Deyo Score</b>          |          |           |            |            |                |
| 0                                   | 6,565    | Ref       |            |            |                |
| 1                                   | 4,258    | 1.145     | 1.078      | 1.217      | <0.001         |
| 2+                                  | 1,382    | 1.337     | 1.227      | 1.458      | <0.001         |
| <b>Year of Diagnosis</b>            |          |           |            |            |                |
| 2004                                | 910      | Ref       |            |            |                |
| 2005                                | 1,237    | 0.976     | 0.872      | 1.091      | 0.67           |

|                                 |          |           |            |            |                |
|---------------------------------|----------|-----------|------------|------------|----------------|
| 2006                            | 1,331    | 0.962     | 0.860      | 1.077      | 0.50           |
| <b>Covariate</b>                | <b>N</b> | <b>HR</b> | <b>LCL</b> | <b>UCL</b> | <b>p Value</b> |
| 2007                            | 1,324    | 0.962     | 0.858      | 1.078      | 0.50           |
| 2008                            | 1,383    | 0.902     | 0.803      | 1.014      | 0.08           |
| 2009                            | 1,280    | 0.899     | 0.795      | 1.016      | 0.09           |
| 2010                            | 1,423    | 0.761     | 0.669      | 0.866      | <0.001         |
| 2011                            | 1,580    | 0.817     | 0.716      | 0.933      | 0.003          |
| 2012                            | 1,737    | 0.822     | 0.709      | 0.952      | 0.009          |
| <b>Primary Site</b>             |          |           |            |            |                |
| Upper Lobe                      | 7,016    | Ref       |            |            |                |
| Middle Lobe                     | 519      | 1.162     | 1.016      | 1.328      | 0.03           |
| Lower Lobe                      | 4,087    | 1.164     | 1.097      | 1.235      | <0.001         |
| Overlapping Lesion              | 366      | 0.903     | 0.758      | 1.074      | 0.25           |
| Lung, NOS                       | 217      | 0.978     | 0.789      | 1.214      | 0.84           |
| <b>Tumor Histological Type</b>  |          |           |            |            |                |
| Adenocarcinoma                  | 6,754    | Ref       |            |            |                |
| Squamous Cell Carcinoma         | 4,200    | 0.824     | 0.773      | 0.878      | <0.001         |
| Large Cell Carcinoma            | 551      | 1.157     | 1.018      | 1.314      | 0.03           |
| Other <sup>c</sup>              | 700      | 1.031     | 0.919      | 1.156      | 0.61           |
| <b>Tumor Pathological Stage</b> |          |           |            |            |                |
| I                               | 3,014    | Ref       |            |            |                |
| II                              | 5,860    | 1.605     | 1.485      | 1.735      | <0.001         |
| III                             | 3,331    | 2.110     | 1.942      | 2.293      | <0.001         |
| <b>Tumor Size</b>               |          | 1.002     | 1.001      | 1.002      | <0.001         |
| <b>Type of Resection</b>        |          |           |            |            |                |
| Lobectomy                       | 10,616   | Ref       |            |            |                |
| Pneumonectomy                   | 1,589    | 1.118     | 1.027      | 1.216      | <0.001         |

NOS = Not otherwise specified

HR = Hazard ratio

LCL = Lower confidence limit

UCL = Upper confidence limit

a = Includes Community Cancer Program, Comprehensive Community Cancer Program, Integrated Network Cancer Program and other specified types of cancer programs.

b = Based on patient's zip code area.

c = Non-small cell not further defined.



**eTable 5. Multivariate Logistic Regression Modeling of Predictors of “Later” (>56 Days) Initiation of Adjuvant Chemotherapy.**

| <b>Covariate</b>                  | <b>N</b> | <b>OR</b> | <b>LCL</b> | <b>UCL</b> | <b>p Value</b> |
|-----------------------------------|----------|-----------|------------|------------|----------------|
| <b>Facility Type</b>              |          |           |            |            |                |
| Academic/Research Program         | 4,228    | Ref       |            |            |                |
| Non-Academic Program <sup>a</sup> | 8,245    | 0.692     | 0.617      | 0.777      | <0.001         |
| <b>Facility Location</b>          |          |           |            |            |                |
| New England                       | 712      | Ref       |            |            |                |
| Middle Atlantic                   | 1,622    | 0.905     | 0.708      | 1.156      | 0.42           |
| South Atlantic                    | 3,009    | 0.879     | 0.699      | 1.105      | 0.27           |
| East North Central                | 2,775    | 0.825     | 0.656      | 1.038      | 0.10           |
| East South Central                | 1,113    | 0.658     | 0.497      | 0.870      | 0.003          |
| West North Central                | 1,296    | 0.845     | 0.651      | 1.098      | 0.21           |
| West South Central                | 682      | 0.818     | 0.612      | 1.092      | 0.17           |
| Mountain                          | 388      | 0.882     | 0.628      | 1.238      | 0.47           |
| Pacific                           | 876      | 0.988     | 0.755      | 1.293      | 0.93           |
| <b>Age</b>                        |          | 1.015     | 1.010      | 1.021      | <0.001         |
| <b>Sex</b>                        |          |           |            |            |                |
| Female                            | 5,829    | Ref       |            |            |                |
| Male                              | 6,644    | 0.844     | 0.778      | 0.916      | <0.001         |
| <b>Race</b>                       |          |           |            |            |                |
| White                             | 10,928   | Ref       |            |            |                |
| Non-White                         | 1,545    | 1.139     | 1.005      | 1.291      | 0.04           |
| <b>Hispanic Origin</b>            |          |           |            |            |                |
| Non-Hispanic                      | 11,224   | Ref       |            |            |                |
| Hispanic Origin                   | 243      | 1.229     | 0.922      | 1.638      | 0.16           |
| Unknown                           | 1,006    | 1.151     | 0.977      | 1.357      | 0.09           |
| <b>Insurance Status</b>           |          |           |            |            |                |
| Medicare                          | 5,812    | Ref       |            |            |                |
| Private Insurance                 | 5,328    | 0.885     | 0.797      | 0.984      | 0.02           |
| Medicaid                          | 709      | 1.248     | 1.031      | 1.512      | 0.02           |
| Not Insured                       | 354      | 1.467     | 1.144      | 1.882      | 0.003          |
| Other Government                  | 126      | 0.958     | 0.637      | 1.439      | 0.84           |
| Status Unknown                    | 144      | 0.739     | 0.495      | 1.104      | 0.14           |
| <b>Education<sup>b</sup></b>      |          |           |            |            |                |
| <7%                               | 2,612    | Ref       |            |            |                |
| 7%-12.9%                          | 4,248    | 1.025     | 0.915      | 1.149      | 0.67           |

|                                      |          |           |            |            |                |
|--------------------------------------|----------|-----------|------------|------------|----------------|
| 13%-20.9%                            | 3,474    | 1.051     | 0.929      | 1.189      | 0.43           |
| ≥ 21%                                | 1,928    | 1.229     | 1.062      | 1.423      | 0.006          |
| <b>Covariate</b>                     | <b>N</b> | <b>OR</b> | <b>LCL</b> | <b>UCL</b> | <b>p Value</b> |
| Unknown                              | 211      | 1.303     | 0.852      | 1.994      | 0.22           |
| <b>Area of Residence<sup>c</sup></b> |          |           |            |            |                |
| Metropolitan                         | 9,642    | Ref       |            |            |                |
| Urban                                | 2,101    | 1.004     | 0.893      | 1.129      | 0.94           |
| Rural                                | 298      | 0.670     | 0.498      | 0.901      | 0.008          |
| Unknown                              | 432      | 0.836     | 0.616      | 1.133      | 0.25           |
| <b>Charlson-Deyo Score</b>           |          |           |            |            |                |
| 0                                    | 6,697    | Ref       |            |            |                |
| 1                                    | 4,352    | 1.083     | 0.991      | 1.183      | 0.08           |
| 2+                                   | 1,424    | 1.106     | 0.970      | 1.262      | 0.13           |
| <b>Year of Diagnosis</b>             |          |           |            |            |                |
| 2004                                 | 929      | Ref       |            |            |                |
| 2005                                 | 1,260    | 0.824     | 0.680      | 0.998      | 0.05           |
| 2006                                 | 1,361    | 0.767     | 0.633      | 0.928      | 0.006          |
| 2007                                 | 1,347    | 0.993     | 0.822      | 1.198      | 0.94           |
| 2008                                 | 1,397    | 1.033     | 0.857      | 1.245      | 0.73           |
| 2009                                 | 1,308    | 1.104     | 0.914      | 1.333      | 0.31           |
| 2010                                 | 1,459    | 0.967     | 0.802      | 1.165      | 0.72           |
| 2011                                 | 1,615    | 1.000     | 0.833      | 1.201      | 0.99           |
| 2012                                 | 1,797    | 0.908     | 0.758      | 1.088      | 0.30           |
| <b>Tumor Laterality</b>              |          |           |            |            |                |
| Right                                | 6,969    | Ref       |            |            |                |
| Left                                 | 5,487    | 0.878     | 0.809      | 0.952      | 0.002          |
| Unknown                              | 17       | 0.968     | 0.327      | 2.865      | 0.95           |
| <b>Tumor Histological Type</b>       |          |           |            |            |                |
| Adenocarcinoma                       | 6,880    | Ref       |            |            |                |
| Squamous Cell Carcinoma              | 4,319    | 1.182     | 1.079      | 1.295      | <0.001         |
| Large Cell Carcinoma                 | 566      | 1.166     | 0.937      | 1.451      | 0.17           |
| Other <sup>d</sup>                   | 708      | 1.259     | 1.053      | 1.505      | 0.011          |
| <b>Tumor Grade</b>                   |          |           |            |            |                |
| 1                                    | 614      | Ref       |            |            |                |
| 2                                    | 5,100    | 1.148     | 0.944      | 1.397      | 0.17           |
| 3                                    | 5,981    | 1.103     | 0.907      | 1.342      | 0.32           |
| 4                                    | 336      | 0.983     | 0.702      | 1.377      | 0.92           |
| Undetermined                         | 442      | 1.353     | 1.021      | 1.792      | 0.04           |
| <b>Tumor Pathological Stage</b>      |          |           |            |            |                |

|                                                |          |           |            |            |                |
|------------------------------------------------|----------|-----------|------------|------------|----------------|
| I                                              | 3,073    | Ref       |            |            |                |
| II                                             | 5,981    | 0.798     | 0.721      | 0.884      | <0.001         |
| III                                            | 3,419    | 0.876     | 0.782      | 0.981      | 0.02           |
| <b>Covariate</b>                               | <b>N</b> | <b>OR</b> | <b>LCL</b> | <b>UCL</b> | <b>p Value</b> |
| <b>Tumor Size</b>                              |          | 1.000     | 0.999      | 1.002      | 0.68           |
| <b>Type of Resection</b>                       |          |           |            |            |                |
| Lobectomy                                      | 10,833   | Ref       |            |            |                |
| Pneumonectomy                                  | 1,640    | 1.315     | 1.162      | 1.489      | <0.001         |
| <b>Length of Inpatient Stay</b>                |          |           |            |            |                |
| ≤ 14 Days                                      | 11,965   | Ref       |            |            |                |
| > 14 Days                                      | 508      | 3.126     | 2.584      | 3.782      | <0.001         |
| <b>Readmission Within 30 Days of Discharge</b> |          |           |            |            |                |
| No                                             | 11,287   | Ref       |            |            |                |
| Unplanned                                      | 435      | 1.772     | 1.440      | 2.179      | <0.001         |
| Planned                                        | 374      | 0.523     | 0.396      | 0.690      | <0.001         |
| Planned and Unplanned                          | 15       | 1.229     | 0.397      | 3.805      | 0.72           |
| Unknown                                        | 362      | 1.188     | 0.935      | 1.510      | 0.16           |

NOS = Not otherwise specified

OR = Odds ratio

LCL = Lower confidence limit

UCL = Upper confidence limit

a = Includes Community Cancer Program, Comprehensive Community Cancer Program, Integrated Network Cancer Program and other specified types of cancer programs.

b = Percent of people in the patient's zip code area with no high-school diploma.

c = Based on patient's zip code area.

d = Non-small cell not further defined.
